# Supplementary material for: Synthesis and crystal structure of a salen-type copper(ii) complex derived from 3,5′-O-dimethyl-2′,3′-diamino-2′,3′-dideoxy-β-d-xylo-uridine
Source: Royal Society of Chemistry journal article supplement (doi:10.1039/b500785b), 2005-01-01
Supplement: b500785b-2.pdf [file b500785b-2.pdf]

## Synthesis and crystal structure of a salen-type copper(II) complex derived from 3,5'-*O*-dimethyl-2',3'-diamino-2',3'-dideoxy- $\beta$ -D-xylo-uridine

Michael Gottschaldt, Daniel Koth and Helmar Görls

### Supplementary experimental data:

*General methods.*--Electronic spectra were recorded with a Varian Cary 1 or Cary 5E spectrophotometer at room temperature. IR spectra were measured on a Perkin-Elmer 2000 spectrometer; NMR spectra on a Bruker Avance 250, mass spectra were carried out on a Finnigan MAT SSQ 710 or a Finnigan MAT 95XL TRAP, elemental analyses on a Vario EL III.

*3,5'-O-dimethyluridine-2',3'-bistrifluoromethane-sulfonate 2.* 3,5'-*O*-dimethyluridine **1** (5 g, 18.4 mmol) and pyridine (3.63 g, 46 mmol) were dissolved in dry CH<sub>2</sub>Cl<sub>2</sub>. trifluoromethanesulfonic anhydride (12.96 g, 46 mmol) was added drop wise to the vigorously stirred solution at -20°C under an argon atmosphere. The reaction mixture was allowed to warm up to room temperature and washed two times with water to remove the formed pyridinium salts. The organic layer was dried with Na<sub>2</sub>SO<sub>4</sub> and evaporated. **2** was obtained as white powder (7.66g, 88%).  $\delta_{\text{H}}$  (250 MHz; CDCl<sub>3</sub>) 7.93 (1 H, d, *J* 7.9, H-5), 6.90 (1 H, d, *J* 6.0, H-2'), 6.39 (1 H, d, *J* 7.9, H-6), 6.18 (1 H, d, *J* 5.9, H-1'), 5.60 (1 H, s, H-3'), 4.76 (1 H, s, H-4'), 3.54 (2 H, dd, *J* 4.4 and 1.9, 2 × H-5'), 3.47 (3H, s, -OCH<sub>3</sub>), 3.08 (3 H, s, -NCH<sub>3</sub>);  $\delta_{\text{C}}$  (CDCl<sub>3</sub>) 28.5 (NCH<sub>3</sub>), 58.9 (OCH<sub>3</sub>), 70.6 (C-5'), 85.7 (C-4'), 85.9 (C-2'), 90.8 (C-3'), 92.8 (C-1'), 108.5 (C-5), 114.8, 116.9, 119.8, 121.9 (2 × -CF<sub>3</sub>), 156.3 (C-2), 158.0 (C-4).

*3,5'-O-dimethyl-2',3'-diazido-2',3'-dideoxy- $\beta$ -D-xylo-uridine 3 and 3-methyl-1-(3-azido-5-methoxymethyl-2(R),5(S)-dihydro-furan-2-yl)-1H-pyrimidine-2,4-dione 4.* **2** (1.45 g, 3 mmol) was dissolved in 30 mL dry DMF. Sodium azide (980 mg, 15 mmol) was added and the suspension was stirred at 50°C for 8 hours. The solvent was evaporated, the residue extracted with ethyl acetate and water. The organic phase was dried with sodium sulphate and the solvent was evaporated yielding 1.2 g of a mixture of **3** and **4** as yellow oil. **3** and **4** were separated by column chromatography (silica gel 60, ethyl acetate/hexane 2:1, *R<sub>f</sub>*(**3**) 0.7, *R<sub>f</sub>*(**4**) 0.5) yielding 310 mg (32%) of **3** and 420 mg (50%) of **4** as colourless oils.

**3:**  $\nu_{\text{max}}$  (ATR, cm<sup>-1</sup>) 2102, 1707, 1657, 1457, 1248, 1092, 805, 762;  $\delta_{\text{H}}$  (250 MHz; CDCl<sub>3</sub>) 7.52 (1 H, d, *J* 8.2, H-5), 5.84 (1 H, d, *J* 3.0, H-1'), 5.75 (1 H, d, *J* 8.2, H-6), 4.35 (1 H, dt, *J* 5.1 and 4.8, H-4'), 4.13 (1 H, dd, *J* 3.1 and 3.0, H-2'), 4.02 (1 H, dd, *J* 3.1 and 1.5, H-3'), 3.64 (2 H, d, *J* 5.2, 2 × H-5'), 3.38 (3H, s, -OCH<sub>3</sub>), 3.27 (3 H, s, -NCH<sub>3</sub>);  $\delta_{\text{C}}$  (CDCl<sub>3</sub>) 27.6 (NCH<sub>3</sub>), 59.4 (OCH<sub>3</sub>), 70.0 (C-5'), 79.9 (C-4'), 69.3 (C-2'), 65.0 (C-3'), 89.2 (C-1'), 101.8 (C-5), 136.7 (C-6), 151.1 (C-2), 162.6 (C-4). MS (DEI) *m/z* 323 ([M+1]<sup>+</sup>).

**4:**  $\nu_{\text{max}}$  (ATR, cm<sup>-1</sup>) 2117, 1711, 1661, 1457, 1194, 1086, 1048, 807,761;  $\delta_{\text{H}}$  (CDCl<sub>3</sub>) 7.65 (d, *J*<sub>5-6</sub> = 8.1 Hz, H-5), 6.80 (m, H-3'), 5.71 (m, H-1'), 5.50 (d, H-6), 4.93 (m, H-4'), 3.52 (m, 2xH-5') 3.38 (s, CH<sub>3</sub>), 3.31 (s, CH<sub>3</sub>);  $\delta_{\text{C}}$  (CDCl<sub>3</sub>) 27.8 (NCH<sub>3</sub>), 59.2 (OCH<sub>3</sub>), 73.2 (C-5'), 83.8 (C-4'), 135.9 (C-2'), 86.7 (C-3'), 102.3 (C-1'), 114.3 (C-5), 138.0 (C-6), 151.7 (C-2), 162.8 (C-4). MS (DEI) *m/z* 280 ([M+1]<sup>+</sup>).

*3,5'-O-dimethyl-2',3'-diamino-2',3'-dideoxy- $\beta$ -D-xylo-uridine 5.* In 30 mL DMF containing 230 mg hydrazine monohydrate **3** (300 mg, 930 mmol) was dissolved. The solution was warmed up to 50°C and Raney-Ni (suspension in methanol) was successively added until no further gas generation was observed. The mixture was stirred for an additional hour, filtered

and the solvent evaporated. Chromatography over silica gel (water/methanol 1:2,  $R_f$  0.4) gave **5** (200 mg, 80%) as yellow oil (Found: C, 47.64; H, 6.49; N, 19.33.  $C_{11}H_{18}N_4O_4$  requires C, 48.88; H, 6.71; N, 20.73%).  $\nu_{\max}$  (ATR,  $cm^{-1}$ ) 3363, 2896, 1704, 1653, 1461, 1294, 1054, 804, 761;  $\delta_H$  (250 MHz;  $CDCl_3$ ) 7.73 (1 H, d,  $J$  8.1, H-5), 5.71 (1 H, d,  $J$  6.0, H-1'), 5.72 (1 H, d,  $J$  8.3, H-6), 4.22 (1 H, dt,  $J$  7.54 and 2.88, H-4'), 3.61 (2 H, d,  $J$  2.9, 2  $\times$  H-5'), 3.26 (1 H, dd,  $J$  6.0 and 9.5, H-3'), 3.07 (1 H, dd,  $J$  6.1 and 7.9, H-2'), 3.35 (3H, s,  $-OCH_3$ ), 3.25 (3 H, s,  $-NCH_3$ );  $\delta_C$  ( $CDCl_3$ ) 27.6 ( $NCH_3$ ), 59.0 ( $OCH_3$ ), 72.1 (C-5'), 78.2 (C-4'), 64.5 (C-2'), 59.9 (C-3'), 90.1 (C-1'), 101.5 (C-5), 138.0 (C-6), 151.9 (C-2), 162.9 (C-4). ESI-HRMS  $m/z$  293.12263 ( $[M+Na]^+$ ,  $C_{11}H_{18}NaN_4O_4^+$  calc. 293.12257).

*3,5'-O-dimethyl-N,N'-bis(3,5-di-tert-butylsalicylidene)-2',3'-diamino-2',3'-dideoxy- $\beta$ -D-xylo-uridine* **6**. To a solution of **5** (530 mg, 1.96 mmol) in dry ethanol 119 mg (3.93 mmol) of 3,5-di-tert-butylsalicyl aldehyde were added and solution was refluxed for two hours. The solvent was evaporated and the raw product was cleaned by chromatography (silica gel 60, ethyl acetate/toluene 1:4,  $R_f$  0.6) to yield 1.30 g (95%) of **6** as yellow amorphous powder (Found: C, 70.36; H, 8.07; N, 7.45.  $C_{41}H_{58}N_4O_6$  requires C, 70.06; H, 8.32; N, 7.97%).  $\nu_{\max}$  (ATR,  $cm^{-1}$ ) 2955, 1712, 1665, 1622, 1457, 1439, 1249, 1096, 803, 760;  $\delta_H$  (250 MHz;  $CDCl_3$ ) 12.84 (1 H, s, OH), 12.70 (1 H, s, OH), 8.35 (1 H, s,  $=NH-$ ), 8.29 (1 H, s,  $=NH-$ ), 7.92 (1 H, d,  $J$  8.2, H-5), 7.18-6.99 (4 H, m,  $H_{arom.}$ ), 6.16 (1 H, d,  $J$  4.2, H-1'), 5.82 (1 H, d,  $J$  8.2, H-6), 4.66 (1 H, m, H-4'), 4.13-4.16 (2 H, m, H-2' and H-3'), 3.60 (2 H, m, 2  $\times$  H-5'), 3.40 (3H, s,  $-OCH_3$ ), 3.23 (3 H, s,  $-NCH_3$ ), 1.36-1.19 (36H, 4s,  $-CH_3$  tert-butyl); ESI-HRMS  $m/z$  725.42586 ( $[M+Na]^+$ ,  $C_{41}H_{58}NaN_4O_6^+$  calc. 725.42541).

*3,5'-O-dimethyl-2',3'-bis(3,5-di-tert-butylsalicylaldiminato)-2',3'-dideoxy- $\beta$ -D-xylo-uridine-copper(II)* **7**. 74 mg of **6** (0.11 mmol) and 23.4 mg (0.23 mmol) triethylamine were dissolved in 20 mL methanol. 14.2 mg (0.11 mmol) copper(II) chloride were added and the resulting dark green solution was stirred at room temperature for one day, filtered and evaporated. The residue was recrystallised from THF/methanol yielding 61 mg (76%) green crystals suitable for single crystal X-ray structure analysis (Found: C, 64.00; H, 7.44; N, 7.16.  $C_{41}H_{56}CuN_4O_6$  requires C, 64.42; H, 7.38; N, 7.33%).  $\nu_{\max}$  (ATR,  $cm^{-1}$ ) 2951, 1706, 1665, 1630, 1525, 1462, 1252, 1157, 1112, 807, 604;  $\lambda_{\max}$ (THF)/nm 240, 268sh, 277 sh and 383 (log $\epsilon$  4.714, 4.483, 4.466, 4.101); MS (FAB in NBA)  $m/z$  764  $[M+1]^+$ .

Table 1. Crystal data and structure refinement for **7**.

|                                 |                                                                  |                     |
|---------------------------------|------------------------------------------------------------------|---------------------|
| Identification code             | FO1968                                                           |                     |
| Empirical formula               | C <sub>41</sub> H <sub>56</sub> Cu N <sub>4</sub> O <sub>6</sub> |                     |
| Formula weight                  | 764.44                                                           |                     |
| Temperature                     | 183(2) K                                                         |                     |
| Wavelength                      | 0.71073 Å                                                        |                     |
| Crystal system                  | Orthorhombic                                                     |                     |
| Space group                     | P2(1)2(1)2(1)                                                    |                     |
| Unit cell dimensions            | a = 11.4800(3) Å                                                 | $\alpha = 90^\circ$ |
|                                 | b = 12.8012(4) Å                                                 | $\beta = 90^\circ$  |
|                                 | c = 28.1994(8) Å                                                 | $\gamma = 90^\circ$ |
| Volume                          | 4144.1(2) Å <sup>3</sup>                                         |                     |
| Z                               | 4                                                                |                     |
| Density (calculated)            | 1.225 Mg/m <sup>3</sup>                                          |                     |
| Absorption coefficient          | 0.575 mm <sup>-1</sup>                                           |                     |
| F(000)                          | 1628                                                             |                     |
| Crystal size                    | 0.03 x 0.02 x 0.02 mm <sup>3</sup>                               |                     |
| Theta range for data collection | 1.92 to 27.47°                                                   |                     |
| Index ranges                    | -14 ≤ h ≤ 14, -16 ≤ k ≤ 16, -36 ≤ l ≤ 36                         |                     |
| Reflections collected           | 8961                                                             |                     |
| Independent reflections         | 8961 [R(int) = 0.0000]                                           |                     |
| Completeness to theta = 27.47°  | 98.5 %                                                           |                     |

Supplementary Material for Organic & Biomolecular Chemistry  
This journal is © The Royal Society of Chemistry 2005

|                                   |                                             |
|-----------------------------------|---------------------------------------------|
| Max. and min. transmission        | 0.9886 and 0.9829                           |
| Refinement method                 | Full-matrix least-squares on F <sup>2</sup> |
| Data / restraints / parameters    | 8961 / 0 / 469                              |
| Goodness-of-fit on F <sup>2</sup> | 1.065                                       |
| Final R indices [I > 2σ(I)]       | R1 = 0.0534, wR2 = 0.1039                   |
| R indices (all data)              | R1 = 0.0775, wR2 = 0.1155                   |
| Absolute structure parameter      | -0.012(12)                                  |
| Largest diff. peak and hole       | 0.397 and -0.417 e.Å <sup>-3</sup>          |

Table 2. Atomic coordinates ( $\times 10^4$ ) and equivalent isotropic displacement parameters ( $\text{\AA}^2 \times 10^3$ ) for 7.  $U(\text{eq})$  is defined as one third of the trace of the orthogonalized  $U^{\text{ij}}$  tensor.

|       | x        | y        | z       | $U(\text{eq})$ |
|-------|----------|----------|---------|----------------|
| Cu    | -2900(1) | 11786(1) | 2681(1) | 22(1)          |
| O(1)  | -2308(2) | 12631(2) | 3177(1) | 26(1)          |
| O(2)  | -3240(2) | 12999(2) | 2318(1) | 24(1)          |
| O(3)  | -3549(2) | 8037(2)  | 2524(1) | 26(1)          |
| O(4)  | -2604(2) | 9024(2)  | 1671(1) | 32(1)          |
| O(5)  | 1333(2)  | 6378(2)  | 2893(1) | 34(1)          |
| O(6)  | -1629(2) | 7958(2)  | 3688(1) | 32(1)          |
| N(1)  | -2419(2) | 10517(2) | 3009(1) | 22(1)          |
| N(2)  | -3889(2) | 10879(2) | 2292(1) | 21(1)          |
| N(3)  | -1698(2) | 7939(2)  | 2878(1) | 24(1)          |
| N(4)  | -118(3)  | 7211(2)  | 3284(1) | 26(1)          |
| C(1)  | -1799(3) | 12362(3) | 3570(1) | 24(1)          |
| C(2)  | -1467(3) | 13163(3) | 3898(1) | 24(1)          |
| C(3)  | -874(3)  | 12873(3) | 4305(1) | 28(1)          |
| C(4)  | -588(3)  | 11835(3) | 4428(1) | 31(1)          |
| C(5)  | -939(3)  | 11075(3) | 4118(1) | 30(1)          |
| C(6)  | -1541(3) | 11304(3) | 3693(1) | 27(1)          |
| C(7)  | -1868(3) | 10432(3) | 3401(1) | 27(1)          |
| C(8)  | 85(3)    | 11614(3) | 4888(1) | 32(1)          |
| C(9)  | 264(5)   | 10442(4) | 4964(2) | 64(2)          |
| C(10) | -577(4)  | 12079(5) | 5305(1) | 57(2)          |
| C(11) | 1291(4)  | 12126(4) | 4860(2) | 47(1)          |
| C(12) | -1767(3) | 14309(3) | 3785(1) | 27(1)          |
| C(13) | -1133(4) | 14653(3) | 3329(1) | 33(1)          |
| C(14) | -1422(4) | 15037(3) | 4190(1) | 34(1)          |
| C(15) | -3094(3) | 14433(3) | 3707(1) | 33(1)          |
| C(16) | -3723(3) | 13037(3) | 1902(1) | 21(1)          |
| C(17) | -3596(3) | 13966(3) | 1614(1) | 25(1)          |
| C(18) | -4198(3) | 14015(3) | 1190(1) | 29(1)          |
| C(19) | -4920(3) | 13218(3) | 1012(1) | 27(1)          |
| C(20) | -4990(3) | 12323(3) | 1273(1) | 26(1)          |
| C(21) | -4396(3) | 12198(3) | 1710(1) | 24(1)          |
| C(22) | -4472(3) | 11179(3) | 1927(1) | 22(1)          |
| C(23) | -5517(4) | 13357(3) | 524(1)  | 36(1)          |
| C(24) | -6262(5) | 14350(4) | 528(2)  | 66(2)          |
| C(25) | -4565(5) | 13437(5) | 147(2)  | 70(2)          |
| C(26) | -6312(4) | 12440(3) | 403(1)  | 38(1)          |
| C(27) | -2777(4) | 14853(3) | 1776(1) | 28(1)          |
| C(28) | -1536(3) | 14424(3) | 1842(2) | 32(1)          |
| C(29) | -3177(3) | 15350(3) | 2246(1) | 31(1)          |
| C(30) | -2700(4) | 15736(3) | 1407(1) | 40(1)          |
| C(31) | -2808(3) | 8523(2)  | 2872(1) | 24(1)          |
| C(32) | -2688(3) | 9637(2)  | 2697(1) | 22(1)          |
| C(33) | -3904(3) | 9831(2)  | 2496(1) | 23(1)          |
| C(34) | -4158(3) | 8807(3)  | 2234(1) | 25(1)          |
| C(35) | -3784(3) | 8708(3)  | 1725(1) | 28(1)          |
| C(36) | -2239(4) | 8996(4)  | 1191(1) | 51(1)          |
| C(37) | -1178(3) | 7686(3)  | 2453(1) | 26(1)          |
| C(38) | -171(3)  | 7159(3)  | 2433(1) | 28(1)          |
| C(39) | 424(3)   | 6870(3)  | 2865(1) | 27(1)          |
| C(40) | -1185(3) | 7708(3)  | 3310(1) | 27(1)          |
| C(41) | 512(3)   | 7029(3)  | 3730(1) | 34(1)          |

Table 3. Bond lengths [Å] and angles [°] for **7**.

|              |           |                   |            |                   |          |
|--------------|-----------|-------------------|------------|-------------------|----------|
| Cu-O(1)      | 1.894(2)  | O(1)-Cu-N(1)      | 91.34(11)  | C(20)-C(21)-C(16) | 120.2(3) |
| Cu-O(2)      | 1.900(2)  | O(2)-Cu-N(1)      | 174.21(11) | C(20)-C(21)-C(22) | 116.2(3) |
| Cu-N(1)      | 1.950(3)  | O(1)-Cu-N(2)      | 163.65(11) | C(16)-C(21)-C(22) | 123.5(3) |
| Cu-N(2)      | 1.960(3)  | O(2)-Cu-N(2)      | 93.72(11)  | N(2)-C(22)-C(21)  | 125.3(3) |
| O(1)-C(1)    | 1.301(4)  | N(1)-Cu-N(2)      | 86.34(11)  | C(25)-C(23)-C(26) | 108.9(4) |
| O(2)-C(16)   | 1.300(4)  | C(1)-O(1)-Cu      | 129.9(2)   | C(25)-C(23)-C(24) | 110.4(4) |
| O(3)-C(31)   | 1.439(4)  | C(16)-O(2)-Cu     | 127.2(2)   | C(26)-C(23)-C(24) | 107.8(4) |
| O(3)-C(34)   | 1.459(4)  | C(31)-O(3)-C(34)  | 111.9(2)   | C(25)-C(23)-C(19) | 108.0(3) |
| O(4)-C(36)   | 1.416(5)  | C(36)-O(4)-C(35)  | 112.2(3)   | C(26)-C(23)-C(19) | 112.1(3) |
| O(4)-C(35)   | 1.421(4)  | C(7)-N(1)-C(32)   | 124.0(3)   | C(24)-C(23)-C(19) | 109.7(3) |
| O(5)-C(39)   | 1.222(4)  | C(7)-N(1)-Cu      | 128.4(2)   | C(17)-C(27)-C(30) | 112.1(3) |
| O(6)-C(40)   | 1.224(4)  | C(32)-N(1)-Cu     | 107.2(2)   | C(17)-C(27)-C(28) | 109.7(3) |
| N(1)-C(7)    | 1.277(4)  | C(22)-N(2)-C(33)  | 125.8(3)   | C(30)-C(27)-C(28) | 107.0(3) |
| N(1)-C(32)   | 1.462(4)  | C(22)-N(2)-Cu     | 124.9(2)   | C(17)-C(27)-C(29) | 112.1(3) |
| N(2)-C(22)   | 1.285(4)  | C(33)-N(2)-Cu     | 109.2(2)   | C(30)-C(27)-C(29) | 107.3(3) |
| N(2)-C(33)   | 1.460(4)  | C(37)-N(3)-C(40)  | 122.1(3)   | C(28)-C(27)-C(29) | 108.5(3) |
| N(3)-C(37)   | 1.378(4)  | C(37)-N(3)-C(31)  | 118.8(3)   | O(3)-C(31)-N(3)   | 107.4(2) |
| N(3)-C(40)   | 1.386(5)  | C(40)-N(3)-C(31)  | 119.0(3)   | O(3)-C(31)-C(32)  | 103.9(3) |
| N(3)-C(31)   | 1.478(4)  | C(40)-N(4)-C(39)  | 125.5(3)   | N(3)-C(31)-C(32)  | 113.7(3) |
| N(4)-C(40)   | 1.382(5)  | C(40)-N(4)-C(41)  | 117.6(3)   | N(1)-C(32)-C(31)  | 123.2(3) |
| N(4)-C(39)   | 1.403(5)  | C(39)-N(4)-C(41)  | 116.9(3)   | N(1)-C(32)-C(33)  | 106.9(3) |
| N(4)-C(41)   | 1.470(5)  | O(1)-C(1)-C(2)    | 118.8(3)   | C(31)-C(32)-C(33) | 101.0(3) |
| C(1)-C(2)    | 1.431(5)  | O(1)-C(1)-C(6)    | 123.3(3)   | N(2)-C(33)-C(32)  | 106.6(3) |
| C(1)-C(6)    | 1.429(5)  | C(2)-C(1)-C(6)    | 117.9(3)   | N(2)-C(33)-C(34)  | 126.7(3) |
| C(2)-C(3)    | 1.386(5)  | C(3)-C(2)-C(1)    | 118.3(3)   | C(32)-C(33)-C(34) | 102.3(3) |
| C(2)-C(12)   | 1.541(5)  | C(3)-C(2)-C(12)   | 122.4(3)   | O(3)-C(34)-C(35)  | 110.0(3) |
| C(3)-C(4)    | 1.411(5)  | C(1)-C(2)-C(12)   | 119.3(3)   | O(3)-C(34)-C(33)  | 102.5(3) |
| C(4)-C(5)    | 1.369(5)  | C(2)-C(3)-C(4)    | 124.7(3)   | C(35)-C(34)-C(33) | 118.5(3) |
| C(4)-C(8)    | 1.536(5)  | C(5)-C(4)-C(3)    | 116.4(3)   | O(4)-C(35)-C(34)  | 110.6(3) |
| C(5)-C(6)    | 1.414(5)  | C(5)-C(4)-C(8)    | 123.8(4)   | C(38)-C(37)-N(3)  | 121.8(3) |
| C(6)-C(7)    | 1.437(5)  | C(3)-C(4)-C(8)    | 119.9(3)   | C(37)-C(38)-C(39) | 120.1(3) |
| C(8)-C(10)   | 1.521(6)  | C(4)-C(5)-C(6)    | 122.5(3)   | O(5)-C(39)-N(4)   | 119.1(3) |
| C(8)-C(9)    | 1.529(6)  | C(5)-C(6)-C(1)    | 120.1(3)   | O(5)-C(39)-C(38)  | 126.1(3) |
| C(8)-C(11)   | 1.534(6)  | C(5)-C(6)-C(7)    | 116.9(3)   | N(4)-C(39)-C(38)  | 114.8(3) |
| C(12)-C(14)  | 1.526(5)  | C(1)-C(6)-C(7)    | 123.0(3)   | O(6)-C(40)-N(4)   | 122.4(3) |
| C(12)-C(15)  | 1.547(5)  | N(1)-C(7)-C(6)    | 124.0(3)   | O(6)-C(40)-N(3)   | 122.2(3) |
| C(12)-C(13)  | 1.543(5)  | C(10)-C(8)-C(9)   | 110.0(4)   | N(4)-C(40)-N(3)   | 115.3(3) |
| C(16)-C(21)  | 1.430(5)  | C(10)-C(8)-C(11)  | 108.9(4)   |                   |          |
| C(16)-C(17)  | 1.447(5)  | C(9)-C(8)-C(11)   | 107.7(4)   |                   |          |
| C(17)-C(18)  | 1.382(5)  | C(10)-C(8)-C(4)   | 109.2(3)   |                   |          |
| C(17)-C(27)  | 1.542(5)  | C(9)-C(8)-C(4)    | 111.6(3)   |                   |          |
| C(18)-C(19)  | 1.408(5)  | C(11)-C(8)-C(4)   | 109.4(3)   |                   |          |
| C(19)-C(20)  | 1.364(5)  | C(14)-C(12)-C(2)  | 111.6(3)   |                   |          |
| C(19)-C(23)  | 1.547(5)  | C(14)-C(12)-C(15) | 107.4(3)   |                   |          |
| C(20)-C(21)  | 1.418(5)  | C(2)-C(12)-C(15)  | 110.3(3)   |                   |          |
| C(21)-C(22)  | 1.442(5)  | C(14)-C(12)-C(13) | 109.1(3)   |                   |          |
| C(23)-C(25)  | 1.529(6)  | C(2)-C(12)-C(13)  | 109.8(3)   |                   |          |
| C(23)-C(26)  | 1.526(6)  | C(15)-C(12)-C(13) | 108.5(3)   |                   |          |
| C(23)-C(24)  | 1.532(6)  | O(2)-C(16)-C(21)  | 122.9(3)   |                   |          |
| C(27)-C(30)  | 1.538(5)  | O(2)-C(16)-C(17)  | 119.6(3)   |                   |          |
| C(27)-C(28)  | 1.539(5)  | C(21)-C(16)-C(17) | 117.4(3)   |                   |          |
| C(27)-C(29)  | 1.541(5)  | C(18)-C(17)-C(16) | 118.1(3)   |                   |          |
| C(31)-C(32)  | 1.516(4)  | C(18)-C(17)-C(27) | 121.8(3)   |                   |          |
| C(32)-C(33)  | 1.526(5)  | C(16)-C(17)-C(27) | 120.1(3)   |                   |          |
| C(33)-C(34)  | 1.533(5)  | C(17)-C(18)-C(19) | 124.8(3)   |                   |          |
| C(34)-C(35)  | 1.504(5)  | C(20)-C(19)-C(18) | 116.8(3)   |                   |          |
| C(37)-C(38)  | 1.340(5)  | C(20)-C(19)-C(23) | 123.4(3)   |                   |          |
| C(38)-C(39)  | 1.445(5)  | C(18)-C(19)-C(23) | 119.7(3)   |                   |          |
| O(1)-Cu-O(2) | 90.20(10) | C(19)-C(20)-C(21) | 122.4(3)   |                   |          |

Table 4. Anisotropic displacement parameters ( $\text{\AA}^2 \times 10^3$ ) for **7**. The anisotropic displacement factor exponent takes the form:  $-2\pi^2 [ h^2 a^*2U^{11} + \dots + 2 h k a^* b^* U^{12} ]$

|       | U <sup>11</sup> | U <sup>22</sup> | U <sup>33</sup> | U <sup>23</sup> | U <sup>13</sup> | U <sup>12</sup> |
|-------|-----------------|-----------------|-----------------|-----------------|-----------------|-----------------|
| Cu    | 23(1)           | 19(1)           | 24(1)           | 0(1)            | -2(1)           | -1(1)           |
| O(1)  | 35(2)           | 22(1)           | 23(1)           | -1(1)           | -6(1)           | -2(1)           |
| O(2)  | 27(1)           | 22(1)           | 23(1)           | 2(1)            | -3(1)           | -1(1)           |
| O(3)  | 20(1)           | 22(1)           | 37(1)           | 0(1)            | -1(1)           | -3(1)           |
| O(4)  | 27(2)           | 44(2)           | 26(1)           | -4(1)           | 2(1)            | -6(1)           |
| O(5)  | 19(1)           | 36(2)           | 46(2)           | 6(1)            | 3(1)            | 6(1)            |
| O(6)  | 37(2)           | 32(2)           | 27(1)           | 3(1)            | 3(1)            | 10(1)           |
| N(1)  | 21(2)           | 21(1)           | 25(2)           | -1(1)           | 1(1)            | 3(1)            |
| N(2)  | 21(1)           | 18(1)           | 24(1)           | -2(1)           | -1(1)           | -2(1)           |
| N(3)  | 25(2)           | 22(2)           | 26(2)           | -1(1)           | 2(1)            | 2(1)            |
| N(4)  | 22(2)           | 26(2)           | 31(2)           | 1(1)            | 2(1)            | -2(1)           |
| C(1)  | 21(2)           | 29(2)           | 24(2)           | 0(2)            | 2(1)            | -1(2)           |
| C(2)  | 19(2)           | 26(2)           | 26(2)           | 2(2)            | 3(1)            | -2(2)           |
| C(3)  | 23(2)           | 36(2)           | 25(2)           | -3(2)           | 0(1)            | -4(2)           |
| C(4)  | 26(2)           | 39(2)           | 27(2)           | 4(2)            | -3(1)           | -1(2)           |
| C(5)  | 33(2)           | 28(2)           | 30(2)           | 5(2)            | -4(2)           | 1(2)            |
| C(6)  | 30(2)           | 24(2)           | 26(2)           | -1(2)           | 2(2)            | -2(2)           |
| C(7)  | 28(2)           | 23(2)           | 30(2)           | 6(2)            | -1(2)           | 2(2)            |
| C(8)  | 29(2)           | 36(2)           | 31(2)           | 6(2)            | -7(2)           | -1(2)           |
| C(9)  | 86(4)           | 47(3)           | 58(3)           | 12(2)           | -39(3)          | -6(3)           |
| C(10) | 47(3)           | 95(4)           | 28(2)           | 12(2)           | -4(2)           | 10(3)           |
| C(11) | 37(3)           | 66(3)           | 38(2)           | 1(2)            | -9(2)           | 1(2)            |
| C(12) | 25(2)           | 27(2)           | 28(2)           | -6(2)           | -3(1)           | -1(2)           |
| C(13) | 37(2)           | 25(2)           | 37(2)           | -1(2)           | -3(2)           | -5(2)           |
| C(14) | 40(2)           | 27(2)           | 36(2)           | -10(2)          | -5(2)           | 0(2)            |
| C(15) | 28(2)           | 32(2)           | 38(2)           | -6(2)           | -3(2)           | 5(2)            |
| C(16) | 16(2)           | 21(2)           | 25(2)           | 0(1)            | 0(1)            | 4(1)            |
| C(17) | 26(2)           | 22(2)           | 26(2)           | -2(1)           | 3(2)            | 0(2)            |
| C(18) | 32(2)           | 26(2)           | 30(2)           | 4(2)            | 1(2)            | 3(2)            |
| C(19) | 30(2)           | 28(2)           | 24(2)           | -1(2)           | 0(1)            | -1(2)           |
| C(20) | 24(2)           | 27(2)           | 27(2)           | -2(2)           | -1(2)           | -4(2)           |
| C(21) | 23(2)           | 20(2)           | 29(2)           | -2(2)           | 3(2)            | 0(1)            |
| C(22) | 15(2)           | 20(2)           | 32(2)           | -5(2)           | 1(2)            | -5(1)           |
| C(23) | 44(2)           | 37(2)           | 28(2)           | 5(2)            | -4(2)           | -5(2)           |
| C(24) | 92(4)           | 40(3)           | 65(3)           | 9(2)            | -42(3)          | 1(3)            |
| C(25) | 67(4)           | 115(5)          | 27(2)           | 11(3)           | -3(2)           | -37(4)          |
| C(26) | 37(2)           | 44(2)           | 34(2)           | 4(2)            | -7(2)           | -4(2)           |
| C(27) | 28(2)           | 23(2)           | 34(2)           | -1(2)           | 1(2)            | -7(2)           |
| C(28) | 26(2)           | 25(2)           | 46(2)           | -3(2)           | 2(2)            | 0(2)            |
| C(29) | 27(2)           | 27(2)           | 41(2)           | -5(2)           | 2(2)            | -5(2)           |
| C(30) | 45(3)           | 29(2)           | 46(2)           | 4(2)            | -3(2)           | -13(2)          |
| C(31) | 20(2)           | 24(2)           | 29(2)           | -1(1)           | 1(2)            | 3(2)            |
| C(32) | 21(2)           | 19(1)           | 27(2)           | 0(2)            | 3(2)            | -4(1)           |
| C(33) | 24(2)           | 17(2)           | 27(2)           | 3(1)            | 0(1)            | -1(1)           |
| C(34) | 17(2)           | 22(2)           | 35(2)           | -2(2)           | -1(1)           | 2(1)            |
| C(35) | 25(2)           | 28(2)           | 30(2)           | -3(2)           | -5(2)           | -3(2)           |
| C(36) | 41(3)           | 85(3)           | 28(2)           | -4(2)           | 5(2)            | -13(3)          |
| C(37) | 25(2)           | 26(2)           | 28(2)           | 1(2)            | 2(1)            | -3(2)           |
| C(38) | 25(2)           | 28(2)           | 30(2)           | -3(2)           | 1(2)            | -2(2)           |
| C(39) | 23(2)           | 22(2)           | 37(2)           | 0(2)            | 2(2)            | -4(2)           |
| C(40) | 28(2)           | 20(2)           | 31(2)           | 1(2)            | 2(2)            | -1(2)           |
| C(41) | 33(2)           | 35(2)           | 35(2)           | 5(2)            | -7(2)           | 3(2)            |

Table 5. Hydrogen coordinates ( $\times 10^4$ ) and isotropic displacement parameters ( $\text{\AA}^2 \times 10^3$ ) for **7**.

|        | x     | y     | z    | U(eq) |
|--------|-------|-------|------|-------|
| H(3A)  | -644  | 13411 | 4517 | 34    |
| H(5A)  | -771  | 10366 | 4191 | 36    |
| H(7A)  | -1662 | 9751  | 3505 | 32    |
| H(9A)  | 693   | 10328 | 5260 | 95    |
| H(9B)  | 710   | 10153 | 4698 | 95    |
| H(9C)  | -495  | 10095 | 4983 | 95    |
| H(10A) | -686  | 12830 | 5253 | 85    |
| H(10B) | -133  | 11967 | 5597 | 85    |
| H(10C) | -1339 | 11739 | 5332 | 85    |
| H(11A) | 1202  | 12880 | 4814 | 71    |
| H(11B) | 1725  | 11830 | 4592 | 71    |
| H(11C) | 1718  | 11994 | 5155 | 71    |
| H(13A) | -290  | 14579 | 3372 | 49    |
| H(13B) | -1320 | 15385 | 3260 | 49    |
| H(13C) | -1385 | 14213 | 3063 | 49    |
| H(14A) | -583  | 14978 | 4248 | 51    |
| H(14B) | -1848 | 14840 | 4477 | 51    |
| H(14C) | -1614 | 15759 | 4104 | 51    |
| H(15A) | -3510 | 14219 | 3995 | 49    |
| H(15B) | -3341 | 13994 | 3441 | 49    |
| H(15C) | -3274 | 15165 | 3637 | 49    |
| H(18A) | -4118 | 14632 | 1006 | 35    |
| H(20A) | -5454 | 11764 | 1158 | 31    |
| H(22A) | -4995 | 10691 | 1789 | 27    |
| H(24A) | -6637 | 14437 | 219  | 98    |
| H(24B) | -5766 | 14955 | 594  | 98    |
| H(24C) | -6860 | 14291 | 775  | 98    |
| H(25A) | -4100 | 12795 | 147  | 104   |
| H(25B) | -4061 | 14035 | 217  | 104   |
| H(25C) | -4924 | 13532 | -165 | 104   |
| H(26A) | -5852 | 11795 | 392  | 57    |
| H(26B) | -6676 | 12560 | 93   | 57    |
| H(26C) | -6918 | 12375 | 646  | 57    |
| H(28A) | -1550 | 13853 | 2074 | 48    |
| H(28B) | -1026 | 14983 | 1957 | 48    |
| H(28C) | -1243 | 14163 | 1538 | 48    |
| H(29A) | -3232 | 14808 | 2491 | 47    |
| H(29B) | -3941 | 15676 | 2202 | 47    |
| H(29C) | -2612 | 15880 | 2345 | 47    |
| H(30A) | -2443 | 15447 | 1102 | 60    |
| H(30B) | -2140 | 16263 | 1514 | 60    |
| H(30C) | -3468 | 16059 | 1368 | 60    |
| H(31A) | -3184 | 8507  | 3191 | 29    |
| H(32A) | -2120 | 9643  | 2428 | 27    |
| H(33A) | -4447 | 9857  | 2773 | 27    |
| H(34A) | -5013 | 8665  | 2253 | 30    |
| H(35A) | -3871 | 7974  | 1621 | 33    |
| H(35B) | -4289 | 9149  | 1523 | 33    |
| H(36A) | -1425 | 9223  | 1170 | 77    |
| H(36B) | -2730 | 9464  | 1002 | 77    |
| H(36C) | -2309 | 8281  | 1069 | 77    |
| H(37A) | -1544 | 7891  | 2165 | 31    |
| H(38A) | 153   | 6975  | 2135 | 33    |
| H(41A) | 50    | 7296  | 3996 | 51    |
| H(41B) | 1264  | 7391  | 3720 | 51    |
| H(41C) | 642   | 6278  | 3772 | 51    |
